# Supplementary material
Source: PubMed Central journal article supplement (PMC1087914)
Supplement: pnas_102_17_6057__2.pdf [file pnas_102_17_6057__2.pdf]

A

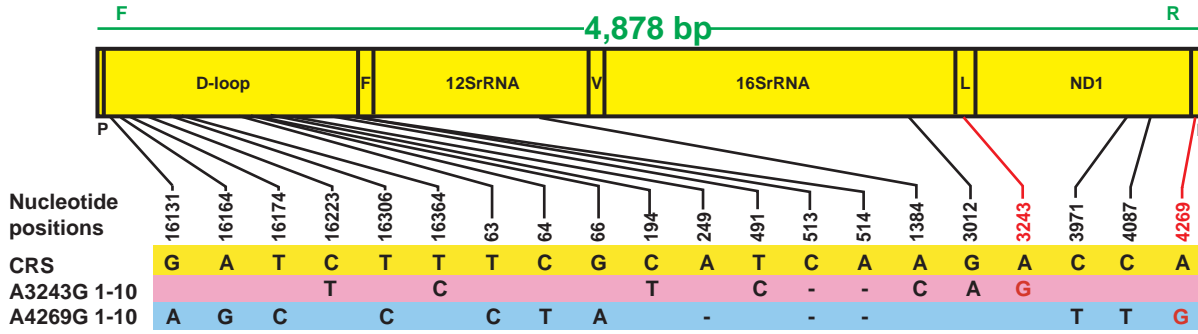

B

| nt position   | 16131 | 16164 | 16174 | 16223 | 16306 | 16364 | 63 | 64 | 66 | 194 | 249 | 491 | 1384 | 3012 | 3243 | 3971 | 4087 | 4269 |
|---------------|-------|-------|-------|-------|-------|-------|----|----|----|-----|-----|-----|------|------|------|------|------|------|
| CRS           | G     | A     | T     | C     | T     | T     | T  | C  | G  | C   | A   | T   | A    | G    | A    | C    | C    | A    |
| clones 1-15   |       |       |       | T     |       | C     |    |    |    |     |     | T   |      | C    | C    | A    | G    |      |
| clone 16      |       |       |       | T     |       | C     |    |    |    |     | T   | -   |      | C    | C    | A    | G    |      |
| clones 17-18  |       |       |       | T     |       | C     |    |    |    |     |     |     |      | C    |      | A    | G    |      |
| clone 19      |       |       |       | T     |       | C     |    |    |    |     |     |     |      | C    |      |      | G    |      |
| clone 20      |       |       |       | T     |       | C     |    |    |    |     |     |     |      | C    | C    |      | G    |      |
| clone 21      |       |       |       | T     |       | C     |    |    |    |     |     |     |      | C    | C    |      | G    | T    |
| clones 22-23  |       |       |       | T     |       | C     |    |    |    |     |     |     |      |      |      | A    | G    |      |
| clone 24      |       |       |       | T     |       | C     | C  | T  | A  | T   |     |     |      | C    | C    | A    | G    |      |
| clones 25-26  | A     | G     | C     |       |       | C     |    |    |    |     |     |     |      | C    | C    | A    | G    |      |
| clone 27      | A     | G     | C     |       |       | C     |    |    |    |     |     |     |      | C    |      | A    | G    |      |
| clones 28-31  | A     | G     | C     |       |       | C     |    | C  | T  | A   |     |     |      | C    | A    | A    | G    |      |
| clones 32-37  | A     | G     | C     |       |       | C     |    | C  | T  | A   |     |     |      |      | A    | A    | G    |      |
| clone 38      | A     | G     | C     |       |       | C     |    | C  | T  | A   |     |     |      |      |      |      | G    |      |
| clone 39      | A     | G     | C     |       |       | C     |    | C  | T  | A   |     |     |      | C    |      |      | G    |      |
| clone 40      | A     | G     | C     |       |       | C     |    | C  | T  | A   |     |     |      | C    | A    | A    | G    | T    |
| clone 41      | A     | G     | C     |       |       | C     |    | C  | T  | A   |     |     |      | C    | A    | A    | G    |      |
| clones 42-43  | A     | G     | C     |       |       | C     |    | C  | T  | A   |     |     |      |      | A    | A    | G    |      |
| clone 44      |       |       |       | T     |       | C     |    |    |    |     |     |     |      | C    |      | A    | G    | G    |
| clone 45      | A     | G     | C     |       |       | C     |    | C  | T  | A   |     |     |      | C    |      | A    | G    | T    |
| clone 46      |       |       |       | T     |       | C     |    |    |    |     |     |     |      |      | A    | G    | T    | T    |
| clone 47      |       |       |       | T     |       | C     |    |    |    |     |     |     |      |      | G    | T    | T    | G    |
| clone 48      |       |       |       | T     |       | C     |    |    |    |     |     |     |      |      | A    | G    | T    | T    |
| clones 49-51  |       |       |       | T     |       | C     |    |    |    |     |     |     |      |      | C    | C    | A    | G    |
| clones 52-59  |       |       |       | T     |       | C     |    |    |    |     |     |     |      |      | C    | C    |      | T    |
| clones 60-62  |       |       |       | T     |       | C     |    |    |    |     |     |     |      |      |      |      | T    | T    |
| clones 63-64  |       |       |       | T     |       | C     |    |    |    |     |     |     |      |      |      |      | T    | T    |
| clone 65      | A     | G     | C     |       |       | C     |    |    |    |     |     |     |      |      |      |      | T    | T    |
| clone 66      | A     | G     | C     |       |       | C     |    |    |    |     |     |     |      |      |      |      | T    | T    |
| clone 67      | A     | G     | C     |       |       | C     |    |    |    |     |     |     |      |      |      |      | T    | T    |
| clones 68-70  | A     | G     | C     |       |       | C     |    | C  | T  | A   |     |     |      | C    |      |      | T    | T    |
| clone 71      | A     | G     | C     |       |       | C     |    | C  | T  | A   |     |     |      |      | A    |      | T    | T    |
| clone 72      | A     | G     | C     |       |       | C     |    | C  | T  | A   |     |     |      |      | C    | A    | T    | T    |
| clone 73      |       |       |       | T     |       | C     |    |    |    |     |     |     |      |      | C    | C    |      | T    |
| clone 74      | A     | G     | C     |       |       | C     |    | C  | T  | A   |     |     |      |      | A    |      | T    |      |
| clones 75-76  |       |       |       | T     |       | C     |    |    |    |     |     |     |      |      |      |      | C    | C    |
| clone 77      |       |       |       | T     |       | C     |    |    |    |     |     |     |      |      |      |      |      | T    |
| clone 78      |       |       |       | T     |       | C     |    | C  | T  | A   |     |     |      |      |      |      |      |      |
| clone 79      | A     | G     | C     |       |       | C     |    | C  | T  | A   |     |     |      |      |      |      |      |      |
| clones 80-100 | A     | G     | C     |       |       | C     |    | C  | T  | A   |     |     |      |      |      |      | T    | T    |

parental 3243mtDNA

double mutant

double wild-type

parental 4269mtDNA

apparent recombinants
