# Supplementary material
Source: PubMed Central journal article supplement (PMC1087914)
Supplement: pnas_102_17_6057__3.pdf [file pnas_102_17_6057__3.pdf]

## Fragment A

| nt position | 63 | 64 | 66 | 194 | 248 | 303-4 | 491 | 879 | 1384 | 2175 | 2455 | 2779 | 2830 | 3012 | 3243 | 3971 | 4087 |
|-------------|----|----|----|-----|-----|-------|-----|-----|------|------|------|------|------|------|------|------|------|
| CRS         | T  | C  | G  | C   | A   | -     | T   | G   | A    | G    | G    | G    | G    | G    | A    | C    | C    |
| A3243G      |    |    |    | T   |     |       | C   |     | C    |      |      |      |      | A    | G    |      |      |
| A4269G      | C  | T  | A  |     | -   |       |     |     |      |      |      |      |      |      |      | T    | T    |

|              |   |   |   |   |   |   |   |   |   |   |   |   |   |   |   |   |   |
|--------------|---|---|---|---|---|---|---|---|---|---|---|---|---|---|---|---|---|
| clones 1-24  |   |   |   | T |   |   | C |   | C |   |   |   |   | A | G |   |   |
| clone 25     |   |   |   | T |   |   | C | A | C |   |   |   |   | A | G |   |   |
| clones 26-27 |   |   |   | T |   |   | C |   | C | T |   |   |   | A | G |   |   |
| clone 28     |   |   |   | T |   |   | C |   | C |   |   | A |   | A | G |   |   |
| clones 29-30 |   |   |   | T |   |   | C |   | C |   |   |   | A | A | G |   |   |
| clones 31-32 | C | T | A |   | - | C |   |   |   |   |   |   |   |   |   | T | T |
| clone 33     | C | T | A |   | - |   |   |   |   |   | A |   |   |   |   | T | T |
| clones 34-85 | C | T | A |   | - |   |   |   |   |   |   |   |   |   |   | T | T |

## Fragment B

| nt position | 3243 | 3382 | 3539 | 3971 | 4087 | 4137 | 4269 | 4279 | 4364 | 4478 | 4564-5 | 4613 | 4614-5 | 4615 | 4618 | 4626 | 4884 |
|-------------|------|------|------|------|------|------|------|------|------|------|--------|------|--------|------|------|------|------|
| CRS         | A    | A    | G    | C    | C    | A    | A    | A    | T    | C    | -      | A    | -      | A    | C    | C    | C    |
| A3243G      | G    |      |      |      |      |      |      |      | C    |      |        |      |        |      |      |      | T    |
| A4269G      |      |      |      | T    | T    |      | G    |      |      |      |        |      |        |      |      |      |      |

|               |   |   |   |   |   |   |   |   |   |   |   |   |   |   |   |   |   |
|---------------|---|---|---|---|---|---|---|---|---|---|---|---|---|---|---|---|---|
| clones 1-40   | G |   |   |   |   |   |   |   | C |   |   |   |   |   |   |   | T |
| clone 41      | G |   |   |   |   | G |   |   | C |   |   |   |   |   |   |   | T |
| clone 42      | G |   |   |   |   |   |   |   | C | A |   |   |   |   |   |   | T |
| clone 43      | G |   |   |   |   |   |   |   | C |   |   |   |   |   |   |   | T |
| clone 44      | G |   |   |   |   |   |   |   | C |   |   |   |   |   |   |   | T |
| clone 45      |   | - |   | T | T |   | G |   |   |   |   |   |   |   |   |   |   |
| clone 46      |   |   | A | T | T |   | G |   |   |   |   |   |   |   |   |   |   |
| clone 47      |   |   |   | T | T |   | G | - |   |   |   |   |   |   |   |   |   |
| clone 48      |   |   |   | T | T |   | G |   |   |   | T |   |   |   |   |   |   |
| clones 49-50  |   |   |   | T | T |   | G |   |   |   |   | T |   |   |   |   |   |
| clone 51      |   |   |   | T | T |   | G |   |   |   |   |   | T |   |   |   |   |
| clone 52      |   |   |   | T | T |   | G |   |   |   |   |   |   | - | - |   |   |
| clone 53      |   |   |   | T | T |   | G |   |   |   |   |   |   |   |   | - |   |
| clone 54      |   |   |   | T | T |   | G |   |   |   |   |   |   |   |   |   |   |
| clone 55      |   |   |   | T | T |   | G |   |   |   |   |   |   |   |   |   |   |
| clone 56      |   |   |   | T | T |   | G |   |   |   |   |   |   |   |   |   |   |
| clones 57-101 |   |   |   | T | T |   | G |   |   |   |   |   |   |   |   |   |   |

| nt position | 4927 | 5179 | 5269 | 5490 | 6393 | 6624 | 6693 | 6723 | 6736 |
|-------------|------|------|------|------|------|------|------|------|------|
| CRS         | C    | C    | A    | C    | T    | C    | A    | G    | A    |
| A3243G      |      | A    | G    |      |      |      |      |      |      |
| A4269G      |      |      |      | T    | C    |      |      |      |      |

|               |   |   |   |   |   |   |   |   |   |
|---------------|---|---|---|---|---|---|---|---|---|
| clones 1-40   |   | A | G |   |   |   |   |   |   |
| clone 41      |   | A | G |   |   |   |   |   |   |
| clone 42      |   | A | G |   |   |   |   |   |   |
| clone 43      | A | A | G |   |   |   |   |   |   |
| clone 44      |   | A | G |   |   | - |   |   |   |
| clone 45      |   |   |   | T | C |   |   |   |   |
| clone 46      |   |   |   | T | C |   |   |   |   |
| clone 47      |   |   |   | T | C |   |   |   |   |
| clone 48      |   |   |   | T | C |   |   |   |   |
| clones 49-50  |   |   |   | T | C |   |   |   |   |
| clone 51      |   |   |   | T | C |   |   |   |   |
| clone 52      |   |   |   | T | C |   |   |   |   |
| clone 53      |   |   |   | T | C |   |   |   |   |
| clone 54      |   |   |   | T | C |   | - |   |   |
| clone 55      |   |   |   | T | C |   |   | - |   |
| clone 56      |   |   |   | T | C |   |   |   | - |
| clones 57-101 |   |   |   | T | C |   |   |   |   |

## Fragment C

| nt position | 9825 | 10311 | 10398 | 10400 | 10610 | 10876 | 12407 |
|-------------|------|-------|-------|-------|-------|-------|-------|
| CRS         | T    | G     | A     | C     | T     | T     | G     |
| A3243G      | A    |       | G     | T     |       | C     |       |
| A4269G      |      | A     |       |       | C     |       | A     |

|              |   |   |   |   |   |   |   |
|--------------|---|---|---|---|---|---|---|
| clones 1-35  | A |   | G | T |   | C |   |
| clones 36-85 |   | A |   |   | C |   | A |
