# Supplementary material
Source: PubMed Central journal article supplement (PMC1087914)
Supplement: pnas_102_17_6057__4.pdf [file pnas_102_17_6057__4.pdf]

| nt position             | 608 | 6515 | 13054 | 13723 | 14551 |
|-------------------------|-----|------|-------|-------|-------|
| <i>M. m. domesticus</i> | T   | A    | -     | T     | T     |
| <i>M. spretus</i>       | T   | A    | -     | T     | T     |

|              |   |   |   |   |   |
|--------------|---|---|---|---|---|
| clone 1      | C |   |   |   |   |
| clone 2      |   | G |   |   |   |
| clone 3      |   |   | C |   |   |
| clone 4      |   |   |   | C | C |
| clones 5-108 |   |   |   |   |   |
