# Supplementary material
Source: PubMed Central journal article supplement (PMC1087914)
Supplement: pnas_102_17_6057__5.pdf [file pnas_102_17_6057__5.pdf]

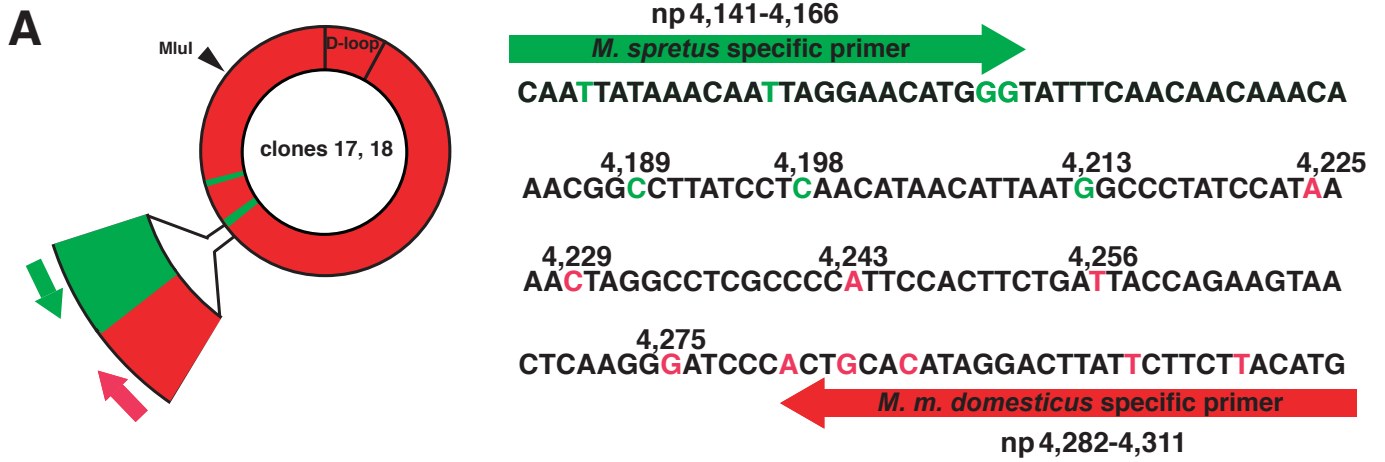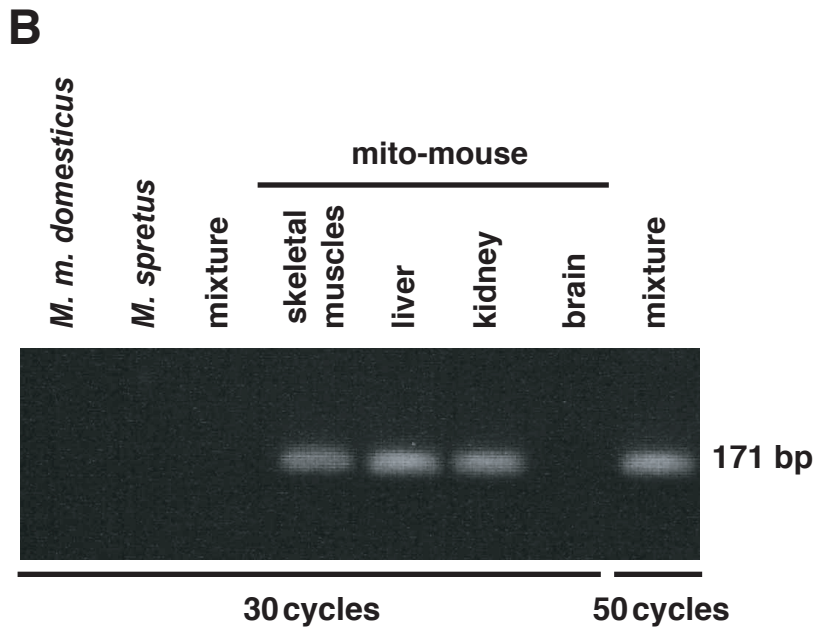

**C**

| nt position                            | 4189  | 4198 | 4213 | 4225 | 4229 | 4243 | 4256 | 4275 |   |
|----------------------------------------|-------|------|------|------|------|------|------|------|---|
| <i>M. m. domesticus</i> mtDNA          | T     | T    | A    | A    | C    | A    | T    | G    |   |
| <i>M. spretus</i> mtDNA                | C     | C    | G    | G    | T    | C    | C    | A    |   |
| recombinant mtDNA                      | C     | C    | G    | A    | C    | A    | T    | G    |   |
| mito-mouse mtDNA from skeletal muscles | cl. 1 | C    | C    | G    | A    | C    | A    | T    | G |
|                                        | cl. 2 | C    | C    | G    | A    | C    | A    | T    | G |
|                                        | cl. 3 | C    | C    | G    | A    | C    | A    | T    | G |
|                                        | cl. 4 | C    | C    | G    | A    | C    | A    | T    | G |
|                                        | cl. 5 | C    | C    | G    | A    | C    | A    | T    | G |
|                                        | cl. 6 | C    | C    | G    | A    | C    | A    | T    | G |
|                                        | cl. 7 | C    | C    | G    | A    | C    | A    | T    | G |
|                                        | cl. 8 | C    | C    | G    | A    | C    | A    | T    | G |
| mixture of parental mtDNAs             | cl. 1 | C    | C    | G    | G    | T    | C    | C    | G |
|                                        | cl. 2 | C    | C    | G    | G    | T    | C    | C    | G |
|                                        | cl. 3 | C    | C    | G    | G    | T    | C    | T    | G |
|                                        | cl. 4 | C    | C    | G    | G    | T    | C    | T    | G |
|                                        | cl. 5 | C    | C    | G    | G    | T    | A    | T    | G |
|                                        | cl. 6 | C    | C    | A    | A    | C    | A    | T    | G |
|                                        | cl. 7 | C    | C    | A    | A    | C    | A    | T    | G |
|                                        | cl. 8 | C    | T    | A    | A    | C    | A    | T    | G |
