# Supplementary material
Source: PubMed Central journal article supplement (PMC1087914)
Supplement: pnas_102_17_6057__6.pdf [file pnas_102_17_6057__6.pdf]

| nt positions  | 326 | 1949 | 3195 | 4078 | 4294 | 5172 | 5581 | 7511 | 9614 | 9622 | 9717-8 | 9740 | 11274 | 11987 | 12055 | 12095 | 12271 | 12726 | 12981 | 13026 | 13321 | 14180 | 14357 | 14757 | 14810 | 15456 | 15468 |
|---------------|-----|------|------|------|------|------|------|------|------|------|--------|------|-------|-------|-------|-------|-------|-------|-------|-------|-------|-------|-------|-------|-------|-------|-------|
| NZB           | A   | A    | A    | A    | A    | A    | T    | T    | A    | T    | -      | C    | T     | T     | A     | T     | A     | A     | A     | A     | T     | T     | A     | A     | T     | T     | A     |
| B6            | A   | A    | A    | A    | A    | A    | T    | T    | A    | T    | -      | C    | T     | T     | A     | T     | A     | A     | A     | A     | T     | T     | A     | A     | T     | T     | A     |
| clone 1       | G   |      |      |      |      |      |      |      |      |      |        |      |       |       |       |       |       |       |       |       |       | C     | G     |       |       |       |       |
| clone 2       |     | G    |      |      |      |      |      |      |      |      |        |      |       |       |       |       |       | G     |       |       |       | C     | G     |       |       |       |       |
| clone 3       |     |      | C    |      |      |      |      |      |      |      |        |      |       |       |       |       |       |       |       |       |       | C     | G     |       |       |       |       |
| clone 4       |     |      |      | G    |      |      |      | C    |      |      |        |      |       |       |       |       |       |       |       |       |       | C     | G     |       |       |       |       |
| clone 5       |     |      |      |      | G    |      |      |      |      |      |        |      |       |       |       |       |       |       |       |       |       | C     | G     |       |       |       |       |
| clone 6       |     |      |      |      |      | -    |      |      |      |      |        |      |       |       |       |       |       |       |       |       |       | C     | G     |       |       |       |       |
| clone 7       |     |      |      |      |      |      |      | C    |      |      |        |      |       |       |       | C     |       |       |       |       |       | C     | G     |       |       | C     |       |
| clone 8       |     |      |      |      |      |      |      |      | -    |      |        |      |       |       |       |       |       |       |       |       |       | C     | G     |       |       |       |       |
| clone 9       |     |      |      |      |      |      |      |      |      | -    | A      |      |       |       |       |       |       |       |       |       |       | C     | G     |       |       |       |       |
| clone 10      |     |      |      |      |      |      |      |      |      |      |        | T    |       |       |       |       |       |       |       |       |       | C     | G     |       |       |       |       |
| clone 11      |     |      |      |      |      |      |      |      |      |      |        |      | C     |       |       |       |       |       |       |       |       | C     | G     |       |       |       |       |
| clone 12      |     |      |      |      |      |      |      |      |      |      |        |      |       | G     |       |       |       |       |       |       |       | C     | G     |       | C     |       |       |
| clone 13      |     |      |      |      |      |      |      |      |      |      |        |      |       |       | G     |       |       |       |       |       |       | C     | G     |       |       |       |       |
| clone 14      |     |      |      |      |      |      |      |      |      |      |        |      |       |       |       |       |       |       |       |       |       | C     | G     |       |       |       |       |
| clone 15      |     |      |      |      |      |      |      |      |      |      |        |      |       |       |       |       |       |       |       |       |       | C     | G     |       |       |       |       |
| clone 16      |     |      |      |      |      |      |      |      |      |      |        |      |       |       |       |       |       |       |       |       |       | C     | G     |       |       |       |       |
| clone 17      |     |      |      |      |      |      |      |      |      |      |        |      |       |       |       |       |       |       |       |       |       | C     | G     |       | G     |       |       |
| clone 18      |     |      |      |      |      |      |      |      |      |      |        |      |       |       |       |       |       |       |       |       |       | C     | G     |       |       |       | C     |
| clones 19-114 |     |      |      |      |      |      |      |      |      |      |        |      |       |       |       |       |       |       |       |       |       | C     | G     |       |       |       |       |
