# Supplementary material
Source: PubMed Central journal article supplement (PMC1087914)

**A**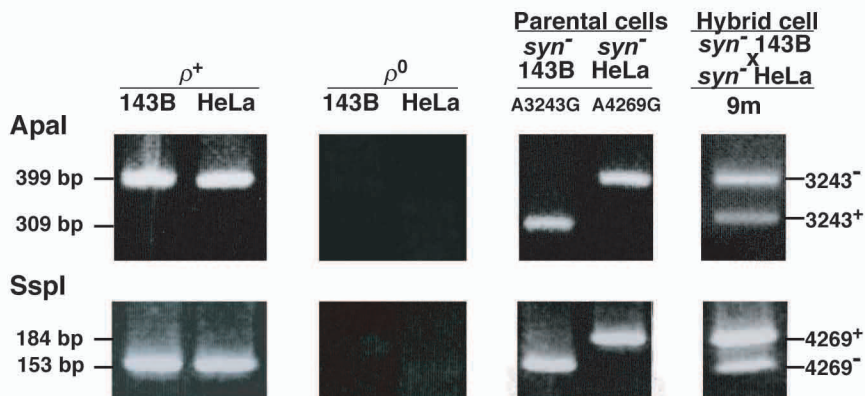**B**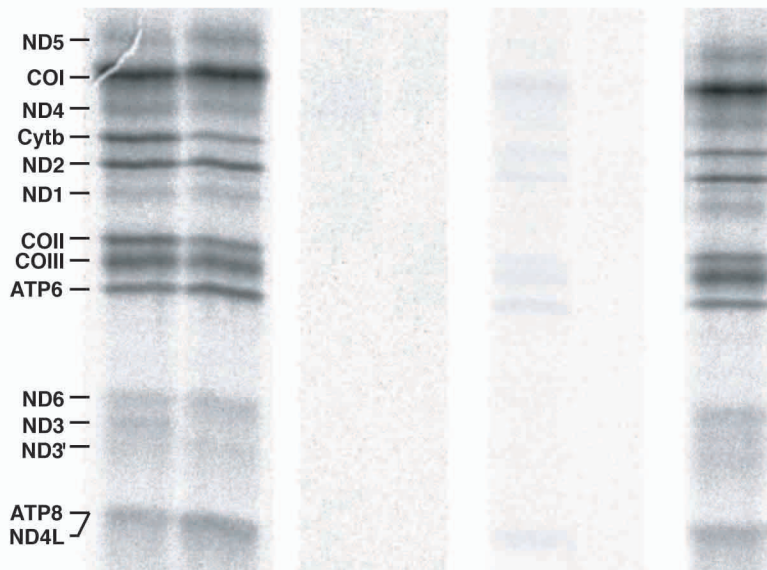**C**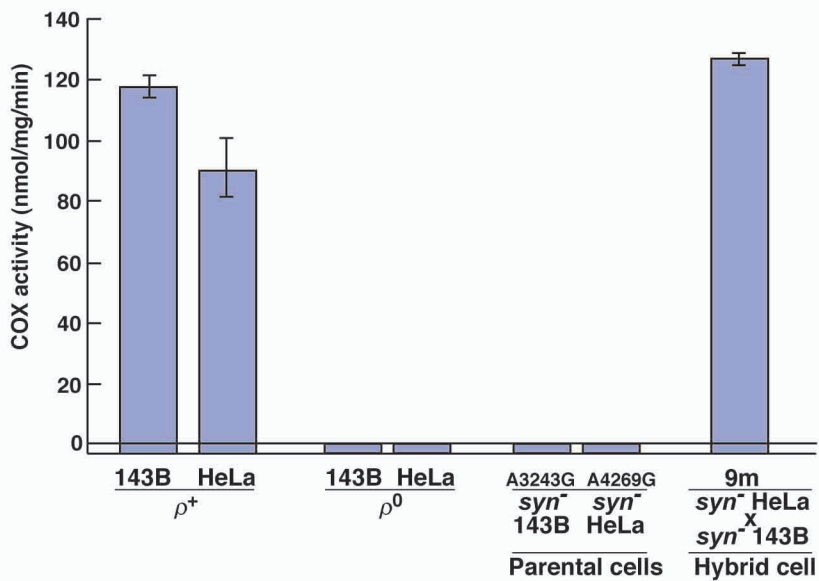

Supplement: pnas_102_17_6057__1.pdf [file pnas_102_17_6057__1.pdf]
